# Supplementary material for: 16S rRNA Gene-Based Metagenomic Analysis of Rhizosphere Soil Bacteria in Arkansas Rice Crop Fields
Source: MDPI journal article supplement (doi:10.3390/agronomy12010222), 2022-01-17
Supplement: s1 [file s1]

Table S1: Class level diversity for the eight locations analyzed (17 samples). See table 1 for location details.

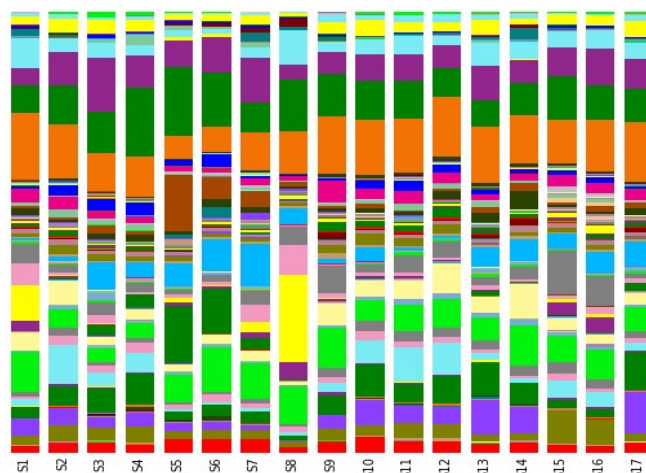

|        |                                                   | Total  | S1     | S2     | S3     | S4     | S5     | S6     | S7    | S8     | S9     | S10    | S11    | S12    | S13    | S14    | S15    | S16    | S17    |
|--------|---------------------------------------------------|--------|--------|--------|--------|--------|--------|--------|-------|--------|--------|--------|--------|--------|--------|--------|--------|--------|--------|
| Legend | Taxonomy                                          | %      | %      | %      | %      | %      | %      | %      | %     | %      | %      | %      | %      | %      | %      | %      | %      | %      | %      |
|        | k_Bacteria.p_Proteobacteria.c_Alphaproteobacteria | 10.90% | 15.00% | 12.30% | 8.60%  | 9.00%  | 5.30%  | 5.70%  | 8.70% | 9.60%  | 12.90% | 12.50% | 12.30% | 13.70% | 12.70% | 11.00% | 10.00% | 11.80% | 13.50% |
|        | k_Bacteria.p_Proteobacteria.c_Betaproteobacteria  | 9.30%  | 6.40%  | 8.90%  | 9.50%  | 15.70% | 15.50% | 12.30% | 6.80% | 11.60% | 9.60%  | 9.00%  | 8.40%  | 6.40%  | 6.10%  | 7.10%  | 9.80%  | 7.80%  | 7.70%  |
|        | k_Bacteria.p_Proteobacteria.c_Deltaproteobacteria | 6.80%  | 4.00%  | 7.40%  | 12.30% | 7.40%  | 6.10%  | 8.10%  | 9.90% | 3.50%  | 5.00%  | 5.80%  | 6.20%  | 5.40%  | 7.60%  | 5.40%  | 6.60%  | 8.20%  | 6.80%  |
|        | k_Bacteria.p_Actinobacteria.c_Actinobacteria      | 6.50%  | 9.20%  | 4.10%  | 3.00%  | 3.30%  | 6.20%  | 10.20% | 8.00% | 8.50%  | 9.10%  | 4.70%  | 6.00%  | 6.50%  | 5.20%  | 9.00%  | 6.10%  | 6.70%  | 5.30%  |
|        | k_Bacteria.p_Acidobacteria.c_Solibactes           | 4.40%  | 2.60%  | 4.50%  | 5.40%  | 7.00%  | 1.90%  | 2.70%  | 2.70% | 0.90%  | 4.40%  | 7.40%  | 4.10%  | 6.30%  | 7.50%  | 4.90%  | 2.10%  | 1.90%  | 8.80%  |
|        | k_Bacteria.p_Chloroflexi.c_Anaerolineae           | 3.90%  | 0.50%  | 1.10%  | 6.20%  | 3.40%  | 5.20%  | 7.20%  | 9.60% | 3.80%  | 1.10%  | 3.10%  | 0.60%  | 0.60%  | 4.50%  | 4.90%  | 3.40%  | 4.70%  | 5.70%  |
|        | k_Bacteria.p_Bacteroidetes.c_[Saprospirae]        | 3.50%  | 4.30%  | 1.90%  | 2.70%  | 2.30%  | 1.20%  | 1.70%  | 3.20% | 4.20%  | 6.00%  | 1.90%  | 3.80%  | 3.80%  | 1.80%  | 2.70%  | 9.90%  | 6.90%  | 1.20%  |
|        | k_Bacteria.p_Proteobacteria.c_Gammaproteobacteria | 3.50%  | 6.60%  | 3.10%  | 3.20%  | 2.30%  | 1.70%  | 1.00%  | 2.50% | 7.70%  | 2.20%  | 3.50%  | 4.10%  | 1.90%  | 5.20%  | 3.80%  | 3.40%  | 4.10%  | 3.60%  |
|        | k_Bacteria.p_Acidobacteria.c_Acidobacteria        | 3.40%  | 3.90%  | 3.70%  | 2.20%  | 3.20%  | 1.90%  | 1.90%  | 1.00% | 0.20%  | 3.10%  | 5.60%  | 3.70%  | 4.00%  | 7.80%  | 6.00%  | 0.10%  | 0.10%  | 9.40%  |
|        | k_Bacteria.p_Actinobacteria.c_Thermoleophila      | 3.40%  | 4.20%  | 5.40%  | 1.60%  | 2.40%  | 1.60%  | 2.00%  | 2.20% | 0.90%  | 4.80%  | 3.60%  | 4.20%  | 6.70%  | 3.50%  | 7.70%  | 2.60%  | 2.10%  | 2.60%  |
|        | k_Bacteria.p_Acidobacteria.c_[Chloracidobacteria] | 3.20%  | 1.60%  | 8.70%  | 3.30%  | 4.40%  | 0.40%  | 0.40%  | 0.80% | 0.90%  | 2.10%  | 5.20%  | 7.70%  | 7.30%  | 1.40%  | 1.00%  | 3.90%  | 3.40%  | 1.70%  |
|        | k_Bacteria.p_Acidobacteria.c_Acidobacteria-6      | 2.90%  | 2.00%  | 3.70%  | 3.10%  | 3.60%  | 1.80%  | 2.10%  | 1.90% | 1.20%  | 2.70%  | 2.40%  | 3.50%  | 3.10%  | 1.50%  | 1.70%  | 7.50%  | 5.70%  | 1.70%  |
|        | Unassigned-Other-Other                            | 2.40%  | 1.60%  | 2.10%  | 2.40%  | 2.00%  | 3.00%  | 3.00%  | 3.20% | 1.30%  | 2.70%  | 3.50%  | 2.70%  | 2.60%  | 2.10%  | 2.40%  | 1.90%  | 1.60%  | 2.30%  |
|        | k_Bacteria.p_Verrucomicrobi.c_[Pedosphaerae]      | 2.40%  | 1.90%  | 3.20%  | 3.20%  | 2.80%  | 1.50%  | 1.70%  | 2.10% | 0.60%  | 2.80%  | 3.50%  | 2.30%  | 1.90%  | 3.50%  | 1.20%  | 2.30%  | 2.30%  | 3.80%  |
|        | k_Bacteria.p_Bacteroidetes.c_Bacteroidia          | 2.10%  | 0.00%  | 0.00%  | 2.30%  | 2.90%  | 13.10% | 10.30% | 2.70% | 0.40%  | 0.00%  | 0.10%  | 0.00%  | 0.00%  | 0.90%  | 0.30%  | 0.00%  | 0.10%  | 1.70%  |
|        | k_Bacteria.p_Gemmatimonadetes.c_Gemmatimonadetes  | 2.10%  | 3.00%  | 2.90%  | 1.50%  | 1.80%  | 1.10%  | 1.10%  | 1.50% | 0.90%  | 4.90%  | 2.30%  | 2.90%  | 2.00%  | 1.30%  | 1.60%  | 2.40%  | 2.30%  | 2.40%  |
|        | k_Bacteria.p_Bacteroidetes.c_Flavobacteria        | 2.00%  | 8.10%  | 0.10%  | 0.20%  | 0.00%  | 1.10%  | 0.40%  | 2.40% | 19.80% | 0.10%  | 0.00%  | 0.00%  | 0.00%  | 0.10%  | 0.00%  | 0.80%  | 0.70%  | 0.00%  |
|        | k_Bacteria.p_Firmicutes.c_Clostridia              | 2.00%  | 0.40%  | 0.40%  | 1.80%  | 0.80%  | 12.80% | 4.90%  | 3.70% | 0.90%  | 0.50%  | 0.90%  | 0.20%  | 0.50%  | 1.20%  | 1.60%  | 0.60%  | 1.20%  | 1.30%  |
|        | k_Bacteria.p_Bacteroidetes.c_Sphingobacteria      | 1.70%  | 5.00%  | 0.50%  | 1.70%  | 0.40%  | 0.70%  | 0.70%  | 3.90% | 6.80%  | 1.20%  | 0.80%  | 0.80%  | 0.70%  | 1.20%  | 0.60%  | 0.90%  | 1.70%  | 0.90%  |
|        | k_Bacteria.p_Actinobacteria.c_Acidimicrobia       | 1.60%  | 1.10%  | 1.80%  | 0.90%  | 1.10%  | 0.60%  | 0.60%  | 1.10% | 0.60%  | 2.10%  | 2.30%  | 2.30%  | 2.10%  | 1.90%  | 2.50%  | 2.60%  | 2.10%  | 1.60%  |
|        | k_Bacteria.p_Firmicutes.c_Bacilli                 | 1.40%  | 1.70%  | 0.70%  | 1.40%  | 1.60%  | 0.90%  | 2.00%  | 1.20% | 0.50%  | 0.70%  | 1.10%  | 0.90%  | 1.80%  | 2.20%  | 4.20%  | 0.50%  | 0.60%  | 1.40%  |
|        | k_Bacteria.p_Nitrospirae.c_Nitrospira             | 1.40%  | 0.50%  | 2.40%  | 2.60%  | 2.80%  | 1.30%  | 2.80%  | 0.60% | 0.20%  | 0.60%  | 1.60%  | 2.20%  | 1.60%  | 1.00%  | 0.80%  | 0.90%  | 1.20%  | 0.50%  |
|        | k_Bacteria.p_Acidobacteria.c_iii-8                | 1.30%  | 0.40%  | 2.20%  | 1.50%  | 2.30%  | 1.00%  | 1.70%  | 0.90% | 1.20%  | 1.30%  | 2.00%  | 1.40%  | 1.20%  | 0.90%  | 0.50%  | 1.50%  | 0.80%  | 1.20%  |
|        | k_Bacteria.p_Chloroflexi.c_Chloroflexi            | 1.20%  | 0.70%  | 2.20%  | 1.30%  | 1.20%  | 1.00%  | 0.80%  | 0.80% | 0.70%  | 1.80%  | 2.70%  | 1.90%  | 2.10%  | 0.30%  | 0.70%  | 0.90%  | 1.10%  | 0.60%  |
|        | k_Bacteria.p_Bacteroidetes.c_Cytophaga            | 1.00%  | 2.40%  | 0.70%  | 0.30%  | 0.10%  | 0.70%  | 0.40%  | 1.30% | 3.80%  | 0.60%  | 0.20%  | 0.50%  | 0.10%  | 0.20%  | 0.10%  | 2.90%  | 3.40%  | 0.10%  |
|        | k_Bacteria.p_Chloroflexi.c_Ellin6529              | 0.80%  | 0.90%  | 1.20%  | 0.80%  | 0.80%  | 0.60%  | 0.90%  | 0.70% | 0.40%  | 1.20%  | 0.70%  | 0.70%  | 0.70%  | 0.70%  | 1.40%  | 1.10%  | 1.10%  | 0.60%  |
|        | k_Bacteria.p_Chloroflexi.c_TK10                   | 0.80%  | 0.60%  | 1.00%  | 0.50%  | 0.60%  | 0.30%  | 0.30%  | 0.20% | 0.10%  | 2.10%  | 1.20%  | 1.30%  | 2.30%  | 0.70%  | 0.60%  | 0.50%  | 0.70%  | 0.80%  |
|        | k_Bacteria.p_Gemmatimonadetes.c_Gemm-1            | 0.80%  | 0.60%  | 1.70%  | 1.20%  | 1.40%  | 0.40%  | 0.30%  | 0.60% | 0.30%  | 0.50%  | 0.90%  | 1.50%  | 1.20%  | 1.20%  | 0.50%  | 0.80%  | 1.00%  | 0.30%  |
|        | k_Bacteria.p_Verrucomicrobi.c_[Spartobacteria]    | 0.80%  | 0.90%  | 1.00%  | 0.50%  | 0.70%  | 0.10%  | 0.10%  | 0.50% | 0.30%  | 1.60%  | 1.20%  | 1.50%  | 1.90%  | 1.00%  | 1.00%  | 0.20%  | 0.20%  | 1.20%  |
|        | k_Bacteria.p_Actinobacteria.c_MB-A2-108           | 0.70%  | 0.20%  | 1.00%  | 0.30%  | 0.50%  | 0.60%  | 0.50%  | 0.40% | 0.10%  | 0.70%  | 0.80%  | 1.40%  | 1.40%  | 0.90%  | 1.40%  | 0.90%  | 0.60%  | 0.50%  |
|        | k_Bacteria.p_TM7.c_TM7-1                          | 0.70%  | 1.70%  | 0.70%  | 0.10%  | 0.10%  | 0.20%  | 0.10%  | 2.10% | 0.60%  | 0.70%  | 0.30%  | 0.20%  | 0.60%  | 0.50%  | 2.70%  | 0.40%  | 0.30%  | 0.30%  |
|        | k_Bacteria.p_Chloroflexi.c_C0119                  | 0.50%  | 0.50%  | 0.50%  | 0.40%  | 0.30%  | 0.50%  | 0.60%  | 0.40% | 0.50%  | 1.30%  | 0.50%  | 0.30%  | 0.50%  | 0.50%  | 0.80%  | 0.40%  | 0.50%  | 0.50%  |
|        | k_Bacteria.p_Chloroflexi.c_Thermomicrobia         | 0.50%  | 0.70%  | 0.60%  | 0.20%  | 0.30%  | 0.20%  | 0.30%  | 0.60% | 0.90%  | 0.70%  | 0.20%  | 0.40%  | 0.70%  | 0.10%  | 0.20%  | 1.20%  | 1.90%  | 0.10%  |
|        | k_Bacteria.p_Plancimycetes.c_Plancimycetia        | 0.50%  | 0.40%  | 0.60%  | 0.30%  | 0.30%  | 0.30%  | 0.40%  | 0.40% | 0.20%  | 0.70%  | 0.70%  | 0.60%  | 0.90%  | 0.70%  | 0.70%  | 0.40%  | 0.60%  | 0.60%  |
|        | k_Bacteria.p_Chloroflexi.c_Kleidonobacteria       | 0.40%  | 0.30%  | 0.30%  | 0.00%  | 0.10%  | 0.30%  | 0.30%  | 0.00% | 0.00%  | 1.70%  | 0.30%  | 0.10%  | 0.30%  | 0.80%  | 1.60%  | 0.00%  | 0.00%  | 1.10%  |
|        | k_Bacteria.p_Elusimicrobi.c_Elusimicrobia         | 0.40%  | 0.30%  | 0.60%  | 0.30%  | 0.20%  | 0.10%  | 0.10%  | 0.50% | 0.10%  | 0.20%  | 0.60%  | 0.70%  | 0.40%  | 0.50%  | 0.10%  | 0.50%  | 0.40%  | 0.70%  |
|        | k_Bacteria.p_WS3.c_PRR-12                         | 0.40%  | 0.00%  | 0.40%  | 1.10%  | 0.80%  | 0.30%  | 0.30%  | 0.10% | 0.00%  | 0.00%  | 0.60%  | 0.60%  | 0.40%  | 0.40%  | 0.20%  | 0.30%  | 0.50%  | 0.30%  |
|        | k_Bacteria.p_Chlamydiae.c_Chlamydia               | 0.30%  | 0.40%  | 0.40%  | 0.50%  | 0.30%  | 0.00%  | 0.00%  | 0.10% | 0.00%  | 0.10%  | 0.30%  | 0.80%  | 0.40%  | 0.70%  | 0.60%  | 0.10%  | 0.30%  | 0.30%  |
|        | k_Bacteria.p_Chlorobi.c_BSV26                     | 0.30%  | 0.00%  | 0.00%  | 1.60%  | 0.30%  | 0.20%  | 0.30%  | 0.20% | 0.00%  | 0.00%  | 0.20%  | 0.10%  | 0.00%  | 0.80%  | 0.40%  | 0.00%  | 0.00%  | 0.30%  |
|        | k_Bacteria.p_Cyanobacteria.c_Chloroplast          | 0.30%  | 0.20%  | 0.10%  | 0.10%  | 0.00%  | 0.40%  | 0.50%  | 0.90% | 0.80%  | 0.60%  | 0.20%  | 0.10%  | 0.10%  | 0.10%  | 0.20%  | 0.20%  | 0.60%  | 0.20%  |
|        | k_Bacteria.p_Gemmatimonadetes.c_Gemm-5            | 0.30%  | 0.10%  | 0.10%  | 0.10%  | 0.10%  | 0.40%  | 0.60%  | 0.40% | 0.10%  | 0.20%  | 0.10%  | 0.00%  | 0.10%  | 0.20%  | 0.10%  | 1.50%  | 0.90%  | 0.20%  |
|        | k_Bacteria.p_Spirochaetes.c_Spirochaetes          | 0.30%  | 0.00%  | 0.00%  | 0.60%  | 2.30%  | 0.90%  | 0.50%  | 0.80% | 0.10%  | 0.00%  | 0.10%  | 0.00%  | 0.00%  | 0.40%  | 0.00%  | 0.00%  | 0.00%  | 0.20%  |
|        | k_Bacteria.p_TM7.c_TM7-3                          | 0.30%  | 0.20%  | 0.00%  | 0.00%  | 0.10%  | 0.50%  | 0.70%  | 1.10% | 1.90%  | 0.10%  | 0.00%  | 0.00%  | 0.00%  | 0.10%  | 0.70%  | 0.00%  | 0.00%  | 0.10%  |
|        | k_Bacteria.p_Verrucomicrobi.c_Opitatae            | 0.30%  | 0.40%  | 0.10%  | 0.80%  | 0.20%  | 0.40%  | 0.30%  | 0.60% | 0.20%  | 0.30%  | 0.10%  | 0.20%  | 0.10%  | 0.10%  | 0.00%  | 0.50%  | 0.40%  | 0.20%  |
|        | k_Bacteria.p_Acidobacteria.c_Acidobacteria-5      | 0.20%  | 0.10%  | 0.40%  | 0.10%  | 0.10%  | 0.00%  | 0.00%  | 0.00% | 0.00%  | 0.10%  | 0.20%  | 0.40%  | 0.60%  | 0.10%  | 0.10%  | 0.20%  | 0.20%  | 0.10%  |
|        | k_Bacteria.p_Acidobacteria.c_BPC102               | 0.20%  | 0.00%  | 0.00%  | 0.40%  | 0.30%  | 0.20%  | 0.30%  | 0.30% | 0.10%  | 0.00%  | 0.20%  | 0.00%  | 0.00%  | 0.20%  | 0.20%  | 0.00%  | 0.10%  | 0.30%  |
|        | k_Bacteria.p_Acidobacteria.c_Holophagae           | 0.20%  | 0.00%  | 0.00%  | 0.10%  | 0.80%  | 0.40%  | 0.80%  | 0.20% | 0.00%  | 0.00%  | 0.10%  | 0.20%  | 0.00%  | 0.10%  | 0.10%  | 0.00%  | 0.00%  | 0.10%  |
|        | k_Bacteria.p_Acidobacteria.c_S035                 | 0.20%  | 0.00%  | 0.30%  | 0.30%  | 0.40%  | 0.10%  | 0.10%  | 0.00% | 0.00%  | 0.00%  | 0.30%  | 0.30%  | 0.40%  | 0.10%  | 0.10%  | 0.10%  | 0.30%  | 0.00%  |
|        | k_Bacteria.p_Acidobacteria.c_Sva0725              | 0.20%  | 0.10%  | 0.30%  | 0.40%  | 0.30%  | 0.00%  | 0.00%  | 0.00% | 0.00%  | 0.60%  | 0.20%  | 0.20%  | 0.20%  | 0.10%  | 0.10%  | 0.40%  | 0.40%  | 0.20%  |
|        | k_Bacteria.p_Chlorobi.c_                          | 0.20%  | 0.30%  | 0.20%  | 0.10%  | 0.20%  | 0.00%  | 0.00%  | 0.30% | 0.10%  | 0.20%  | 0.10%  | 0.20%  | 0.20%  | 0.20%  | 0.00%  | 0.10%  | 0.10%  | 0.20%  |
|        | k_Bacteria.p_Chloroflexi.c_S085                   | 0.20%  | 0.20%  | 0.30%  | 0.20%  | 0.20%  | 0.10%  | 0.10%  | 0.00% | 0.00%  | 0.10%  | 0.20%  | 0.40%  | 0.40%  | 0.30%  | 0.20%  | 0.30%  | 0.40%  | 0.10%  |
|        | k_Bacteria.p_Chloroflexi.c_TK17                   | 0.20%  | 0.10%  | 0.20%  | 0.30%  | 0.20%  | 0.10%  | 0.10%  | 0.10% | 0.10%  | 0.20%  | 0.20%  | 0.20%  | 0.30%  | 0.30%  | 0.20%  | 0.30%  | 0.20%  | 0.20%  |
|        | k_Bacteria.p_Fibrobacteres.c_Fibrobacteria        | 0.20%  | 0.10%  | 0.10%  | 0.10%  | 0.00%  | 0.20%  | 0.00%  | 1.70% | 0.70%  | 0.10%  | 0.00%  | 0.10%  | 0.00%  | 0.10%  | 0.00%  | 0.00%  | 0.00%  | 0.00%  |
|        | k_Bacteria.p_Fibrobacteres.c_TG3                  | 0.20%  | 0.00%  | 0.00%  | 0.10%  | 0.00%  | 0.60%  | 2.40%  | 0.10% | 0.00%  | 0.00%  | 0.00%  | 0.00%  | 0.00%  | 0.00%  | 0.10%  | 0.00%  | 0.00%  | 0.10%  |
|        | k_Bacteria.p_OD1.c_SM2F11                         | 0.20%  | 0.40%  | 0.20%  | 0.10%  | 0.10%  | 0.00%  | 0.10%  | 0.20% | 0.00%  | 0.00%  | 0.10%  | 0.20%  | 0.30%  | 0.10%  | 0.20%  | 0.50%  | 0.20%  | 0.10%  |
|        | k_Bacteria.p_Plancimycetes.c_Phycisphaerae        | 0.20%  | 0.10%  | 0.10%  | 0.20%  | 0.20%  | 0.00%  | 0.00%  | 0.10% | 0.00%  | 0.10%  | 0.20%  | 0.20%  | 0.10%  | 0.30%  | 0.20%  | 0.30%  | 0.30%  | 0.30%  |
|        | k_Bacteria.p_Acidobacteria.c_DA052                | 0.10%  | 0.00%  | 0.10%  | 0.00%  | 0.10%  | 0.00%  | 0.00%  | 0.00% | 0.00%  | 0.00%  | 0.10%  | 0.20%  | 0.20%  | 0.60%  | 0.10%  | 0.00%  | 0.00%  | 0.10%  |
|        | k_Bacteria.p_Acidobacteria.c_TM1                  | 0.10%  | 0.10%  | 0.10%  | 0.10%  | 0.10%  | 0.00%  | 0.00%  | 0.00% | 0.00%  | 0.00%  | 0.10%  | 0.30%  | 0.10%  | 0.50%  | 0.00%  | 0.00%  | 0.00%  | 0.10%  |
|        | k_Bacteria.p_Actinobacteria.c_OPB41               | 0.10%  | 0.00%  | 0.00%  | 0.50%  | 0.20%  | 0.20%  | 0.30%  | 0.20% | 0.10%  | 0.00%  | 0.20%  | 0.00%  | 0.00%  | 0.10%  | 0.30%  | 0.00%  | 0.10%  | 0.10%  |

|                                                     |       |       |       |       |       |       |       |       |       |       |       |       |       |       |       |       |       |       |
|-----------------------------------------------------|-------|-------|-------|-------|-------|-------|-------|-------|-------|-------|-------|-------|-------|-------|-------|-------|-------|-------|
| k_Bacteria.p_Actinobacteria.c_Rubrobacteria         | 0.10% | 0.00% | 0.10% | 0.10% | 0.20% | 0.00% | 0.00% | 0.00% | 0.10% | 0.00% | 0.00% | 0.00% | 0.00% | 0.00% | 0.00% | 0.40% | 0.60% | 0.00% |
| k_Bacteria.p_Armalimonadetes.c_0319-BE2             | 0.10% | 0.10% | 0.10% | 0.00% | 0.00% | 0.00% | 0.00% | 0.00% | 0.00% | 0.20% | 0.00% | 0.10% | 0.10% | 0.00% | 0.00% | 0.10% | 0.10% | 0.00% |
| k_Bacteria.p_Armalimonadetes.c_Chthonomonadetes     | 0.10% | 0.00% | 0.10% | 0.10% | 0.10% | 0.00% | 0.00% | 0.00% | 0.00% | 0.10% | 0.20% | 0.20% | 0.20% | 0.20% | 0.10% | 0.10% | 0.10% | 0.20% |
| k_Bacteria.p_Armalimonadetes.c_Fimbrimonadia        | 0.10% | 0.10% | 0.20% | 0.10% | 0.10% | 0.00% | 0.00% | 0.00% | 0.00% | 0.10% | 0.10% | 0.20% | 0.10% | 0.10% | 0.10% | 0.20% | 0.10% | 0.10% |
| k_Bacteria.p_Chlorobici_Lignibacteria               | 0.10% | 0.00% | 0.00% | 0.50% | 0.20% | 0.10% | 0.10% | 0.30% | 0.00% | 0.00% | 0.00% | 0.00% | 0.00% | 0.10% | 0.10% | 0.00% | 0.00% | 0.30% |
| k_Bacteria.p_Chlorobici_OPB56                       | 0.10% | 0.00% | 0.00% | 0.10% | 0.00% | 0.20% | 0.10% | 0.10% | 0.10% | 0.10% | 0.00% | 0.00% | 0.00% | 0.20% | 0.00% | 0.10% | 0.10% | 0.20% |
| k_Bacteria.p_Chloroflexi.c_Dehaloкокocoidetes       | 0.10% | 0.00% | 0.00% | 0.10% | 0.10% | 0.30% | 0.50% | 0.30% | 0.10% | 0.00% | 0.10% | 0.00% | 0.00% | 0.30% | 0.20% | 0.00% | 0.10% | 0.40% |
| k_Bacteria.p_Chloroflexi.c_Gltt-GS-136              | 0.10% | 0.00% | 0.10% | 0.00% | 0.10% | 0.00% | 0.00% | 0.10% | 0.10% | 0.10% | 0.10% | 0.10% | 0.10% | 0.10% | 0.20% | 0.10% | 0.10% | 0.10% |
| k_Bacteria.p_Cyanobacteria.c_4Cdd-2                 | 0.10% | 0.20% | 0.10% | 0.10% | 0.10% | 0.00% | 0.00% | 0.10% | 0.00% | 0.10% | 0.10% | 0.20% | 0.10% | 0.20% | 0.10% | 0.10% | 0.10% | 0.20% |
| k_Bacteria.p_Cyanobacteria.c_ML63J-21               | 0.10% | 0.20% | 0.20% | 0.10% | 0.10% | 0.00% | 0.00% | 0.20% | 0.00% | 0.10% | 0.10% | 0.20% | 0.10% | 0.10% | 0.20% | 0.10% | 0.10% | 0.20% |
| k_Bacteria.p_Cyanobacteria.c_Synechococcophycideae  | 0.10% | 0.00% | 0.00% | 0.00% | 0.00% | 0.00% | 0.10% | 0.20% | 0.00% | 0.10% | 0.20% | 0.00% | 0.00% | 0.00% | 0.20% | 0.80% | 0.00% |       |
| k_Bacteria.p_Elusimicrobia.c_Endomicrobia           | 0.10% | 0.00% | 0.00% | 0.20% | 0.20% | 0.00% | 0.00% | 0.10% | 0.00% | 0.00% | 0.10% | 0.00% | 0.00% | 0.10% | 0.10% | 0.00% | 0.00% | 0.10% |
| k_Bacteria.p_FCPU426.c                              | 0.10% | 0.10% | 0.10% | 0.00% | 0.00% | 0.00% | 0.00% | 0.00% | 0.00% | 0.00% | 0.10% | 0.40% | 0.00% | 0.10% | 0.00% | 0.00% | 0.00% | 0.10% |
| k_Bacteria.p_Fibrobacteres.c                        | 0.10% | 0.00% | 0.00% | 0.00% | 0.00% | 1.40% | 0.20% | 0.10% | 0.00% | 0.00% | 0.00% | 0.00% | 0.00% | 0.00% | 0.00% | 0.00% | 0.00% | 0.00% |
| k_Bacteria.p_Gemmatimonadetes.c                     | 0.10% | 0.00% | 0.00% | 0.00% | 0.00% | 0.00% | 0.00% | 0.00% | 0.00% | 0.00% | 0.00% | 0.00% | 0.00% | 0.00% | 0.00% | 0.90% | 0.60% | 0.00% |
| k_Bacteria.p_OD1.c                                  | 0.10% | 0.10% | 0.10% | 0.20% | 0.10% | 0.00% | 0.00% | 0.10% | 0.00% | 0.00% | 0.00% | 0.10% | 0.10% | 0.00% | 0.00% | 0.10% | 0.00% | 0.00% |
| k_Bacteria.p_OD1.c_ABY1                             | 0.10% | 0.10% | 0.00% | 0.20% | 0.10% | 0.00% | 0.00% | 0.10% | 0.00% | 0.00% | 0.00% | 0.10% | 0.00% | 0.20% | 0.00% | 0.00% | 0.00% | 0.00% |
| k_Bacteria.p_OD1.c_ZB2                              | 0.10% | 0.10% | 0.10% | 0.00% | 0.00% | 0.00% | 0.10% | 0.40% | 0.00% | 0.00% | 0.00% | 0.10% | 0.10% | 0.10% | 0.00% | 0.00% | 0.00% | 0.00% |
| k_Bacteria.p_OP3.c_kofl11                           | 0.10% | 0.10% | 0.10% | 0.10% | 0.10% | 0.00% | 0.00% | 0.00% | 0.00% | 0.00% | 0.10% | 0.20% | 0.10% | 0.10% | 0.00% | 0.10% | 0.00% | 0.00% |
| k_Bacteria.p_Proteobacteria.c_Epsilonproteobacteria | 0.10% | 0.00% | 0.00% | 0.00% | 0.00% | 0.70% | 0.60% | 0.10% | 0.00% | 0.00% | 0.00% | 0.00% | 0.00% | 0.00% | 0.20% | 0.00% | 0.00% | 0.00% |
| k_Bacteria.p_TM6.c_SJA-4                            | 0.10% | 0.10% | 0.10% | 0.10% | 0.10% | 0.00% | 0.00% | 0.00% | 0.00% | 0.00% | 0.10% | 0.10% | 0.00% | 0.20% | 0.20% | 0.00% | 0.00% | 0.10% |
| k_Bacteria.p_TM7.c_SC3                              | 0.10% | 0.10% | 0.10% | 0.00% | 0.00% | 0.00% | 0.20% | 0.20% | 0.00% | 0.20% | 0.10% | 0.00% | 0.20% | 0.10% | 0.20% | 0.30% | 0.10% | 0.20% |
| k_Bacteria.p_Verrucomicrobia.c_Verrucomicrobiae     | 0.10% | 0.20% | 0.10% | 0.00% | 0.00% | 0.10% | 0.10% | 0.20% | 0.40% | 0.10% | 0.00% | 0.00% | 0.00% | 0.00% | 0.00% | 0.20% | 0.20% | 0.00% |
| k_Bacteria.p_WPS-2.c                                | 0.10% | 0.10% | 0.10% | 0.00% | 0.00% | 0.00% | 0.00% | 0.00% | 0.00% | 0.40% | 0.10% | 0.10% | 0.10% | 0.20% | 0.30% | 0.00% | 0.00% | 0.40% |
| k_Archaea.p_Crenarchaeota.c_MBGA                    | 0.00% | 0.00% | 0.00% | 0.00% | 0.00% | 0.00% | 0.00% | 0.00% | 0.00% | 0.00% | 0.00% | 0.00% | 0.00% | 0.00% | 0.00% | 0.00% | 0.00% | 0.00% |
| k_Archaea.p_Crenarchaeota.c_MCG                     | 0.00% | 0.00% | 0.00% | 0.00% | 0.00% | 0.00% | 0.00% | 0.00% | 0.00% | 0.00% | 0.00% | 0.00% | 0.00% | 0.00% | 0.00% | 0.00% | 0.00% | 0.00% |
| k_Archaea.p_Crenarchaeota.c_Thaumarchaeota          | 0.00% | 0.00% | 0.00% | 0.00% | 0.00% | 0.00% | 0.00% | 0.00% | 0.00% | 0.00% | 0.00% | 0.00% | 0.00% | 0.00% | 0.00% | 0.00% | 0.00% | 0.00% |
| k_Archaea.p_Euryarchaeota.c_DSEG                    | 0.00% | 0.00% | 0.00% | 0.00% | 0.00% | 0.00% | 0.00% | 0.00% | 0.00% | 0.00% | 0.00% | 0.00% | 0.00% | 0.00% | 0.00% | 0.00% | 0.00% | 0.00% |
| k_Archaea.p_Euryarchaeota.c_Methanobacteria         | 0.00% | 0.00% | 0.00% | 0.00% | 0.00% | 0.00% | 0.00% | 0.00% | 0.00% | 0.00% | 0.00% | 0.00% | 0.00% | 0.00% | 0.00% | 0.00% | 0.00% | 0.00% |
| k_Archaea.p_Euryarchaeota.c_Methanomicrobia         | 0.00% | 0.00% | 0.00% | 0.00% | 0.00% | 0.00% | 0.00% | 0.00% | 0.00% | 0.00% | 0.00% | 0.00% | 0.00% | 0.00% | 0.00% | 0.00% | 0.00% | 0.00% |
| k_Archaea.p_Euryarchaeota.c_Thermoplasmata          | 0.00% | 0.00% | 0.00% | 0.00% | 0.00% | 0.00% | 0.00% | 0.00% | 0.00% | 0.00% | 0.00% | 0.00% | 0.00% | 0.00% | 0.00% | 0.00% | 0.00% | 0.00% |
| k_Archaea.p_[Parvarchaeota].c_[Micrarchaea]         | 0.00% | 0.00% | 0.00% | 0.00% | 0.00% | 0.00% | 0.00% | 0.00% | 0.00% | 0.00% | 0.00% | 0.00% | 0.00% | 0.00% | 0.00% | 0.00% | 0.00% | 0.00% |
| k_Archaea.p_[Parvarchaeota].c_[Parvarchaea]         | 0.00% | 0.00% | 0.00% | 0.00% | 0.00% | 0.00% | 0.00% | 0.00% | 0.00% | 0.00% | 0.00% | 0.00% | 0.00% | 0.00% | 0.00% | 0.00% | 0.00% | 0.00% |
| k_Bacteria.Other.Other                              | 0.00% | 0.00% | 0.00% | 0.00% | 0.00% | 0.00% | 0.00% | 0.00% | 0.00% | 0.00% | 0.00% | 0.00% | 0.00% | 0.00% | 0.00% | 0.00% | 0.00% | 0.00% |
| k_Bacteria.p_c                                      | 0.00% | 0.00% | 0.00% | 0.00% | 0.00% | 0.00% | 0.00% | 0.00% | 0.00% | 0.00% | 0.00% | 0.00% | 0.00% | 0.00% | 0.00% | 0.00% | 0.00% | 0.00% |
| k_Bacteria.p_AC1.Other                              | 0.00% | 0.00% | 0.00% | 0.00% | 0.00% | 0.00% | 0.00% | 0.00% | 0.00% | 0.00% | 0.00% | 0.00% | 0.00% | 0.00% | 0.00% | 0.00% | 0.00% | 0.00% |
| k_Bacteria.p_AC1.c_HDBW-WB69                        | 0.00% | 0.00% | 0.00% | 0.00% | 0.00% | 0.00% | 0.00% | 0.00% | 0.00% | 0.00% | 0.00% | 0.00% | 0.00% | 0.00% | 0.00% | 0.00% | 0.00% | 0.00% |
| k_Bacteria.p_AC1.c_SHA-114                          | 0.00% | 0.00% | 0.00% | 0.00% | 0.00% | 0.00% | 0.00% | 0.00% | 0.00% | 0.00% | 0.00% | 0.00% | 0.00% | 0.00% | 0.00% | 0.00% | 0.00% | 0.00% |
| k_Bacteria.p_AD3.c                                  | 0.00% | 0.00% | 0.00% | 0.00% | 0.00% | 0.00% | 0.00% | 0.00% | 0.00% | 0.00% | 0.00% | 0.00% | 0.00% | 0.00% | 0.00% | 0.00% | 0.00% | 0.00% |
| k_Bacteria.p_AD3.c_ABS-6                            | 0.00% | 0.00% | 0.00% | 0.00% | 0.00% | 0.00% | 0.00% | 0.00% | 0.00% | 0.00% | 0.00% | 0.00% | 0.00% | 0.20% | 0.20% | 0.00% | 0.00% | 0.10% |
| k_Bacteria.p_AD3.c_JG37-AG-4                        | 0.00% | 0.00% | 0.00% | 0.00% | 0.00% | 0.00% | 0.00% | 0.00% | 0.00% | 0.00% | 0.10% | 0.00% | 0.00% | 0.10% | 0.10% | 0.00% | 0.00% | 0.10% |
| k_Bacteria.p_Acidobacteria.Other                    | 0.00% | 0.00% | 0.00% | 0.00% | 0.00% | 0.00% | 0.00% | 0.00% | 0.00% | 0.00% | 0.00% | 0.00% | 0.00% | 0.00% | 0.00% | 0.00% | 0.00% | 0.00% |
| k_Bacteria.p_Acidobacteria.c                        | 0.00% | 0.00% | 0.10% | 0.10% | 0.20% | 0.00% | 0.00% | 0.00% | 0.00% | 0.00% | 0.00% | 0.10% | 0.00% | 0.00% | 0.00% | 0.00% | 0.00% | 0.00% |
| k_Bacteria.p_Acidobacteria.c_AT-s54                 | 0.00% | 0.00% | 0.00% | 0.00% | 0.00% | 0.00% | 0.00% | 0.00% | 0.00% | 0.00% | 0.00% | 0.00% | 0.00% | 0.00% | 0.00% | 0.00% | 0.00% | 0.00% |
| k_Bacteria.p_Acidobacteria.c_EC1113                 | 0.00% | 0.00% | 0.10% | 0.00% | 0.00% | 0.00% | 0.00% | 0.00% | 0.00% | 0.00% | 0.00% | 0.00% | 0.00% | 0.00% | 0.00% | 0.00% | 0.00% | 0.00% |
| k_Bacteria.p_Acidobacteria.c_OS-K                   | 0.00% | 0.00% | 0.00% | 0.00% | 0.00% | 0.00% | 0.00% | 0.00% | 0.00% | 0.00% | 0.00% | 0.00% | 0.00% | 0.00% | 0.00% | 0.00% | 0.00% | 0.00% |
| k_Bacteria.p_Acidobacteria.c_PAUC37f                | 0.00% | 0.00% | 0.00% | 0.10% | 0.10% | 0.00% | 0.00% | 0.00% | 0.00% | 0.00% | 0.00% | 0.10% | 0.10% | 0.00% | 0.00% | 0.00% | 0.00% | 0.00% |
| k_Bacteria.p_Acidobacteria.c_RB25                   | 0.00% | 0.00% | 0.00% | 0.10% | 0.00% | 0.00% | 0.00% | 0.00% | 0.00% | 0.00% | 0.00% | 0.00% | 0.00% | 0.00% | 0.00% | 0.10% | 0.10% | 0.00% |
| k_Bacteria.p_Actinobacteria.Other                   | 0.00% | 0.00% | 0.00% | 0.00% | 0.00% | 0.00% | 0.00% | 0.00% | 0.00% | 0.00% | 0.00% | 0.00% | 0.00% | 0.00% | 0.00% | 0.00% | 0.00% | 0.00% |
| k_Bacteria.p_Actinobacteria.c                       | 0.00% | 0.00% | 0.00% | 0.00% | 0.00% | 0.00% | 0.00% | 0.00% | 0.00% | 0.00% | 0.00% | 0.00% | 0.00% | 0.00% | 0.00% | 0.00% | 0.00% | 0.00% |
| k_Bacteria.p_Actinobacteria.c_KIST-JY010            | 0.00% | 0.00% | 0.00% | 0.00% | 0.00% | 0.00% | 0.00% | 0.00% | 0.00% | 0.00% | 0.00% | 0.00% | 0.00% | 0.00% | 0.00% | 0.00% | 0.00% | 0.00% |
| k_Bacteria.p_Actinobacteria.c_Nitilriuptoria        | 0.00% | 0.00% | 0.00% | 0.00% | 0.00% | 0.00% | 0.00% | 0.00% | 0.00% | 0.00% | 0.00% | 0.00% | 0.00% | 0.00% | 0.00% | 0.10% | 0.00% | 0.00% |
| k_Bacteria.p_Armalimonadetes.c_Armalimonadia        | 0.00% | 0.00% | 0.00% | 0.00% | 0.00% | 0.00% | 0.00% | 0.00% | 0.00% | 0.00% | 0.00% | 0.00% | 0.00% | 0.00% | 0.00% | 0.00% | 0.00% | 0.00% |
| k_Bacteria.p_Armalimonadetes.c_OPB50                | 0.00% | 0.00% | 0.00% | 0.00% | 0.00% | 0.00% | 0.00% | 0.00% | 0.00% | 0.00% | 0.00% | 0.00% | 0.00% | 0.00% | 0.00% | 0.00% | 0.00% | 0.00% |
| k_Bacteria.p_Armalimonadetes.c_SHA-37               | 0.00% | 0.00% | 0.00% | 0.00% | 0.00% | 0.00% | 0.00% | 0.00% | 0.00% | 0.00% | 0.00% | 0.00% | 0.00% | 0.00% | 0.00% | 0.00% | 0.00% | 0.00% |
| k_Bacteria.p_Armalimonadetes.c_SJA-176              | 0.00% | 0.00% | 0.00% | 0.10% | 0.10% | 0.00% | 0.00% | 0.10% | 0.00% | 0.00% | 0.00% | 0.00% | 0.00% | 0.00% | 0.10% | 0.00% | 0.00% | 0.00% |
| k_Bacteria.p_BH180-139.c                            | 0.00% | 0.00% | 0.00% | 0.00% | 0.00% | 0.00% | 0.00% | 0.00% | 0.00% | 0.00% | 0.00% | 0.00% | 0.10% | 0.00% | 0.00% | 0.10% | 0.00% | 0.00% |
| k_Bacteria.p_BRC1.c                                 | 0.00% | 0.00% | 0.00% | 0.00% | 0.00% | 0.00% | 0.00% | 0.00% | 0.00% | 0.00% | 0.00% | 0.00% | 0.00% | 0.00% | 0.00% | 0.00% | 0.00% | 0.00% |
| k_Bacteria.p_BRC1.c_NPL-UPA2                        | 0.00% | 0.00% | 0.00% | 0.00% | 0.00% | 0.00% | 0.00% | 0.00% | 0.00% | 0.00% | 0.00% | 0.00% | 0.00% | 0.00% | 0.00% | 0.00% | 0.00% | 0.00% |
| k_Bacteria.p_BRC1.c_PRR-11                          | 0.00% | 0.00% | 0.00% | 0.10% | 0.10% | 0.00% | 0.00% | 0.00% | 0.00% | 0.00% | 0.10% | 0.00% | 0.00% | 0.10% | 0.00% | 0.00% | 0.00% | 0.10% |
| k_Bacteria.p_Bacteroidetes.Other                    | 0.00% | 0.00% | 0.00% | 0.00% | 0.00% | 0.00% | 0.00% | 0.00% | 0.00% | 0.00% | 0.00% | 0.00% | 0.00% | 0.00% | 0.00% | 0.00% | 0.00% | 0.00% |
| k_Bacteria.p_Bacteroidetes.c_A120OctB3              | 0.00% | 0.00% | 0.00% | 0.00% | 0.00% | 0.00% | 0.00% | 0.00% | 0.00% | 0.10% | 0.00% | 0.00% | 0.00% | 0.00% | 0.00% | 0.00% | 0.00% | 0.00% |
| k_Bacteria.p_Bacteroidetes.c_BME43                  | 0.00% | 0.00% | 0.00% | 0.00% | 0.00% | 0.00% | 0.00% | 0.00% | 0.00% | 0.00% | 0.00% | 0.00% | 0.00% | 0.00% | 0.00% | 0.00% | 0.00% | 0.00% |
| k_Bacteria.p_Bacteroidetes.c_SM1A07                 | 0.00% | 0.00% | 0.00% | 0.00% | 0.00% | 0.00% | 0.00% | 0.00% | 0.00% | 0.00% | 0.00% | 0.00% | 0.00% | 0.00% | 0.00% | 0.00% | 0.00% | 0.00% |
| k_Bacteria.p_Bacteroidetes.c_VC2_1_Bac22            | 0.00% | 0.00% | 0.00% | 0.20% | 0.00% | 0.00% | 0.00% | 0.00% | 0.00% | 0.00% | 0.00% | 0.00% | 0.00% | 0.00% | 0.00% | 0.00% | 0.00% | 0.00% |
| k_Bacteria.p_Bacteroidetes.c_[Rhodotherm]           | 0.00% | 0.00% | 0.00% | 0.00% | 0.00% | 0.00% | 0.00% | 0.00% | 0.00% | 0.00% | 0.00% | 0.00% | 0.00% | 0.00% | 0.00% | 0.10% | 0.10% | 0.00% |
| k_Bacteria.p_Chlorobici_Chlorobia                   | 0.00% | 0.00% | 0.00% | 0.00% | 0.00% | 0.00% | 0.00% | 0.00% | 0.00% | 0.00% | 0.00% | 0.00% | 0.00% | 0.00% | 0.00% | 0.00% | 0.00% | 0.00% |
| k_Bacteria.p_Chlorobici_SJA-28                      | 0.00% | 0.00  |       |       |       |       |       |       |       |       |       |       |       |       |       |       |       |       |

|                                                  |       |       |       |       |       |       |       |       |       |       |       |       |       |       |       |       |       |       |       |
|--------------------------------------------------|-------|-------|-------|-------|-------|-------|-------|-------|-------|-------|-------|-------|-------|-------|-------|-------|-------|-------|-------|
| k_Bacteria.p_Fusobacteriaceae_Fusobacteri        | 0.00% | 0.00% | 0.00% | 0.00% | 0.00% | 0.00% | 0.00% | 0.00% | 0.00% | 0.00% | 0.00% | 0.00% | 0.00% | 0.00% | 0.00% | 0.00% | 0.00% | 0.00% | 0.00% |
| k_Bacteria.p_GAL15.c_                            | 0.00% | 0.00% | 0.00% | 0.00% | 0.00% | 0.00% | 0.00% | 0.00% | 0.00% | 0.00% | 0.00% | 0.00% | 0.00% | 0.00% | 0.10% | 0.00% | 0.00% | 0.00% | 0.00% |
| k_Bacteria.p_GN02.c_                             | 0.00% | 0.00% | 0.00% | 0.00% | 0.00% | 0.00% | 0.00% | 0.00% | 0.00% | 0.00% | 0.00% | 0.00% | 0.00% | 0.00% | 0.00% | 0.00% | 0.00% | 0.00% | 0.00% |
| k_Bacteria.p_GN02.c_SBR-5F                       | 0.00% | 0.00% | 0.00% | 0.00% | 0.00% | 0.00% | 0.00% | 0.00% | 0.00% | 0.00% | 0.00% | 0.00% | 0.00% | 0.00% | 0.00% | 0.00% | 0.00% | 0.00% | 0.00% |
| k_Bacteria.p_GN02.c_BB34                         | 0.00% | 0.00% | 0.00% | 0.00% | 0.00% | 0.00% | 0.00% | 0.00% | 0.00% | 0.00% | 0.00% | 0.00% | 0.00% | 0.00% | 0.00% | 0.00% | 0.00% | 0.00% | 0.00% |
| k_Bacteria.p_GN02.c_BD1-5                        | 0.00% | 0.00% | 0.00% | 0.00% | 0.00% | 0.00% | 0.10% | 0.00% | 0.00% | 0.00% | 0.00% | 0.00% | 0.00% | 0.00% | 0.00% | 0.00% | 0.00% | 0.00% | 0.00% |
| k_Bacteria.p_GN02.c_KGS2-174                     | 0.00% | 0.10% | 0.10% | 0.00% | 0.00% | 0.00% | 0.00% | 0.00% | 0.00% | 0.00% | 0.00% | 0.00% | 0.00% | 0.10% | 0.00% | 0.00% | 0.10% | 0.00% | 0.00% |
| k_Bacteria.p_GN02.c_GN07                         | 0.00% | 0.00% | 0.00% | 0.00% | 0.00% | 0.00% | 0.00% | 0.00% | 0.00% | 0.00% | 0.00% | 0.00% | 0.00% | 0.00% | 0.00% | 0.00% | 0.00% | 0.00% | 0.00% |
| k_Bacteria.p_GN02.c_IBB17                        | 0.00% | 0.00% | 0.00% | 0.00% | 0.00% | 0.00% | 0.00% | 0.00% | 0.00% | 0.00% | 0.00% | 0.00% | 0.00% | 0.00% | 0.00% | 0.00% | 0.00% | 0.00% | 0.00% |
| k_Bacteria.p_GN04.c_                             | 0.00% | 0.00% | 0.00% | 0.00% | 0.00% | 0.00% | 0.00% | 0.00% | 0.00% | 0.00% | 0.00% | 0.00% | 0.00% | 0.00% | 0.00% | 0.00% | 0.00% | 0.00% | 0.00% |
| k_Bacteria.p_GN04.c_GN15                         | 0.00% | 0.00% | 0.00% | 0.10% | 0.10% | 0.00% | 0.00% | 0.00% | 0.00% | 0.00% | 0.00% | 0.00% | 0.00% | 0.00% | 0.00% | 0.00% | 0.00% | 0.00% | 0.00% |
| k_Bacteria.p_GN04.c_MSR-5A5                      | 0.00% | 0.00% | 0.00% | 0.00% | 0.00% | 0.00% | 0.00% | 0.00% | 0.00% | 0.00% | 0.00% | 0.00% | 0.00% | 0.00% | 0.00% | 0.00% | 0.00% | 0.00% | 0.00% |
| k_Bacteria.p_GOUTA4.c_                           | 0.00% | 0.00% | 0.00% | 0.00% | 0.00% | 0.00% | 0.00% | 0.00% | 0.00% | 0.00% | 0.00% | 0.00% | 0.00% | 0.00% | 0.10% | 0.00% | 0.00% | 0.00% | 0.10% |
| k_Bacteria.p_Gemmatimonadetes_c_Gemm-2           | 0.00% | 0.00% | 0.00% | 0.00% | 0.00% | 0.00% | 0.00% | 0.00% | 0.00% | 0.00% | 0.00% | 0.00% | 0.00% | 0.00% | 0.00% | 0.00% | 0.20% | 0.20% | 0.00% |
| k_Bacteria.p_Gemmatimonadetes_c_Gemm-3           | 0.00% | 0.00% | 0.00% | 0.00% | 0.00% | 0.00% | 0.00% | 0.00% | 0.00% | 0.00% | 0.10% | 0.10% | 0.00% | 0.00% | 0.00% | 0.00% | 0.30% | 0.10% | 0.00% |
| k_Bacteria.p_Gemmatimonadetes_c_IL-ETNP-Z39      | 0.00% | 0.00% | 0.00% | 0.00% | 0.00% | 0.00% | 0.00% | 0.00% | 0.00% | 0.00% | 0.00% | 0.00% | 0.00% | 0.00% | 0.00% | 0.00% | 0.00% | 0.00% | 0.00% |
| k_Bacteria.p_Kazan-38-2B.c_                      | 0.00% | 0.10% | 0.00% | 0.10% | 0.00% | 0.00% | 0.00% | 0.00% | 0.00% | 0.00% | 0.00% | 0.00% | 0.00% | 0.00% | 0.00% | 0.00% | 0.00% | 0.00% | 0.00% |
| k_Bacteria.p_LD1.c_                              | 0.00% | 0.00% | 0.00% | 0.00% | 0.00% | 0.00% | 0.00% | 0.00% | 0.00% | 0.00% | 0.00% | 0.00% | 0.00% | 0.00% | 0.00% | 0.00% | 0.00% | 0.00% | 0.00% |
| k_Bacteria.p_Lentisphaerae_c_[Lentisphaeria]     | 0.00% | 0.00% | 0.00% | 0.00% | 0.00% | 0.00% | 0.00% | 0.00% | 0.00% | 0.00% | 0.00% | 0.00% | 0.00% | 0.00% | 0.00% | 0.00% | 0.00% | 0.00% | 0.00% |
| k_Bacteria.p_MVP-21.c_                           | 0.00% | 0.00% | 0.00% | 0.00% | 0.00% | 0.00% | 0.00% | 0.00% | 0.00% | 0.00% | 0.00% | 0.00% | 0.00% | 0.00% | 0.00% | 0.00% | 0.10% | 0.00% | 0.00% |
| k_Bacteria.p_MVS-104.c_                          | 0.00% | 0.00% | 0.00% | 0.00% | 0.00% | 0.00% | 0.00% | 0.00% | 0.00% | 0.00% | 0.00% | 0.00% | 0.00% | 0.00% | 0.00% | 0.00% | 0.00% | 0.00% | 0.00% |
| k_Bacteria.p_NC10.c_12-24                        | 0.00% | 0.00% | 0.00% | 0.10% | 0.00% | 0.00% | 0.10% | 0.00% | 0.00% | 0.00% | 0.00% | 0.10% | 0.00% | 0.00% | 0.10% | 0.00% | 0.00% | 0.00% | 0.00% |
| k_Bacteria.p_NKB19.Other                         | 0.00% | 0.00% | 0.00% | 0.00% | 0.00% | 0.00% | 0.00% | 0.00% | 0.00% | 0.00% | 0.00% | 0.00% | 0.00% | 0.00% | 0.00% | 0.00% | 0.00% | 0.00% | 0.00% |
| k_Bacteria.p_NKB19.c_                            | 0.00% | 0.00% | 0.00% | 0.10% | 0.00% | 0.00% | 0.00% | 0.00% | 0.00% | 0.00% | 0.00% | 0.00% | 0.00% | 0.00% | 0.00% | 0.00% | 0.00% | 0.00% | 0.00% |
| k_Bacteria.p_NKB19.c_TSBW08                      | 0.00% | 0.00% | 0.00% | 0.00% | 0.00% | 0.00% | 0.00% | 0.00% | 0.00% | 0.00% | 0.00% | 0.00% | 0.00% | 0.00% | 0.00% | 0.00% | 0.00% | 0.00% | 0.00% |
| k_Bacteria.p_OD1.c_Mb-NB09                       | 0.00% | 0.00% | 0.00% | 0.10% | 0.00% | 0.00% | 0.00% | 0.00% | 0.00% | 0.00% | 0.00% | 0.00% | 0.00% | 0.00% | 0.00% | 0.00% | 0.00% | 0.00% | 0.00% |
| k_Bacteria.p_OP11.c_                             | 0.00% | 0.00% | 0.00% | 0.00% | 0.00% | 0.00% | 0.00% | 0.00% | 0.00% | 0.00% | 0.00% | 0.00% | 0.00% | 0.00% | 0.00% | 0.00% | 0.00% | 0.00% | 0.00% |
| k_Bacteria.p_OP11.c_OP11-1                       | 0.00% | 0.00% | 0.00% | 0.00% | 0.00% | 0.00% | 0.00% | 0.00% | 0.00% | 0.00% | 0.00% | 0.00% | 0.00% | 0.00% | 0.00% | 0.00% | 0.00% | 0.00% | 0.00% |
| k_Bacteria.p_OP11.c_OP11-2                       | 0.00% | 0.00% | 0.00% | 0.00% | 0.00% | 0.00% | 0.00% | 0.00% | 0.00% | 0.00% | 0.00% | 0.00% | 0.00% | 0.00% | 0.00% | 0.00% | 0.00% | 0.00% | 0.00% |
| k_Bacteria.p_OP11.c_OP11-3                       | 0.00% | 0.00% | 0.00% | 0.00% | 0.00% | 0.00% | 0.00% | 0.00% | 0.00% | 0.00% | 0.00% | 0.00% | 0.00% | 0.00% | 0.00% | 0.00% | 0.00% | 0.00% | 0.00% |
| k_Bacteria.p_OP11.c_OP11-4                       | 0.00% | 0.00% | 0.00% | 0.00% | 0.00% | 0.00% | 0.00% | 0.00% | 0.00% | 0.00% | 0.00% | 0.00% | 0.00% | 0.00% | 0.00% | 0.00% | 0.00% | 0.00% | 0.00% |
| k_Bacteria.p_OP11.c_WCHB1-64                     | 0.00% | 0.00% | 0.00% | 0.00% | 0.00% | 0.00% | 0.00% | 0.00% | 0.00% | 0.00% | 0.00% | 0.00% | 0.00% | 0.00% | 0.00% | 0.00% | 0.00% | 0.00% | 0.00% |
| k_Bacteria.p_OP3.c_BD4-9                         | 0.00% | 0.00% | 0.00% | 0.10% | 0.00% | 0.00% | 0.00% | 0.00% | 0.00% | 0.00% | 0.00% | 0.00% | 0.00% | 0.00% | 0.00% | 0.00% | 0.00% | 0.00% | 0.00% |
| k_Bacteria.p_OP3.c_PBS-25                        | 0.00% | 0.00% | 0.00% | 0.00% | 0.00% | 0.00% | 0.00% | 0.00% | 0.00% | 0.00% | 0.00% | 0.00% | 0.10% | 0.00% | 0.00% | 0.00% | 0.00% | 0.00% | 0.00% |
| k_Bacteria.p_OP8.c_OP8_1                         | 0.00% | 0.00% | 0.00% | 0.00% | 0.00% | 0.00% | 0.00% | 0.00% | 0.00% | 0.00% | 0.00% | 0.00% | 0.00% | 0.00% | 0.00% | 0.00% | 0.00% | 0.00% | 0.00% |
| k_Bacteria.p_OP8.c_OP8_2                         | 0.00% | 0.00% | 0.00% | 0.00% | 0.00% | 0.00% | 0.00% | 0.00% | 0.00% | 0.00% | 0.00% | 0.00% | 0.00% | 0.00% | 0.00% | 0.00% | 0.00% | 0.00% | 0.00% |
| k_Bacteria.p_Planctomycetes.c_                   | 0.00% | 0.00% | 0.00% | 0.00% | 0.00% | 0.00% | 0.00% | 0.00% | 0.00% | 0.00% | 0.00% | 0.00% | 0.00% | 0.00% | 0.00% | 0.00% | 0.00% | 0.00% | 0.00% |
| k_Bacteria.p_Planctomycetes.c_Q28H05-P-BN-P5     | 0.00% | 0.00% | 0.00% | 0.00% | 0.00% | 0.00% | 0.00% | 0.00% | 0.00% | 0.00% | 0.00% | 0.00% | 0.00% | 0.00% | 0.00% | 0.00% | 0.00% | 0.00% | 0.00% |
| k_Bacteria.p_Planctomycetes.c_BD7-11             | 0.00% | 0.00% | 0.00% | 0.00% | 0.00% | 0.00% | 0.00% | 0.00% | 0.00% | 0.00% | 0.10% | 0.00% | 0.10% | 0.10% | 0.10% | 0.00% | 0.00% | 0.00% | 0.00% |
| k_Bacteria.p_Planctomycetes.c_C6                 | 0.00% | 0.00% | 0.00% | 0.10% | 0.10% | 0.00% | 0.00% | 0.00% | 0.00% | 0.00% | 0.00% | 0.00% | 0.10% | 0.00% | 0.00% | 0.00% | 0.00% | 0.00% | 0.00% |
| k_Bacteria.p_Planctomycetes.c_ODP123             | 0.00% | 0.00% | 0.00% | 0.10% | 0.10% | 0.00% | 0.00% | 0.00% | 0.00% | 0.00% | 0.00% | 0.00% | 0.00% | 0.00% | 0.00% | 0.00% | 0.00% | 0.00% | 0.00% |
| k_Bacteria.p_Planctomycetes.c_OM190              | 0.00% | 0.00% | 0.10% | 0.10% | 0.10% | 0.00% | 0.00% | 0.00% | 0.00% | 0.00% | 0.00% | 0.00% | 0.10% | 0.10% | 0.00% | 0.00% | 0.10% | 0.10% | 0.00% |
| k_Bacteria.p_Planctomycetes.c_Pla3               | 0.00% | 0.00% | 0.00% | 0.00% | 0.00% | 0.00% | 0.00% | 0.00% | 0.00% | 0.00% | 0.00% | 0.00% | 0.00% | 0.00% | 0.00% | 0.00% | 0.00% | 0.00% | 0.00% |
| k_Bacteria.p_Planctomycetes.c_Pla4               | 0.00% | 0.00% | 0.00% | 0.00% | 0.00% | 0.00% | 0.00% | 0.00% | 0.00% | 0.00% | 0.00% | 0.00% | 0.00% | 0.00% | 0.00% | 0.00% | 0.00% | 0.00% | 0.00% |
| k_Bacteria.p_Planctomycetes.c_vadinHA49          | 0.00% | 0.10% | 0.00% | 0.10% | 0.00% | 0.00% | 0.00% | 0.00% | 0.00% | 0.00% | 0.20% | 0.00% | 0.00% | 0.10% | 0.00% | 0.00% | 0.00% | 0.00% | 0.00% |
| k_Bacteria.p_Proteobacteria.Other                | 0.00% | 0.00% | 0.00% | 0.00% | 0.00% | 0.00% | 0.00% | 0.00% | 0.00% | 0.00% | 0.00% | 0.00% | 0.00% | 0.00% | 0.00% | 0.00% | 0.00% | 0.00% | 0.00% |
| k_Bacteria.p_Proteobacteria.c_                   | 0.00% | 0.10% | 0.00% | 0.00% | 0.00% | 0.00% | 0.00% | 0.00% | 0.00% | 0.00% | 0.00% | 0.00% | 0.10% | 0.00% | 0.00% | 0.00% | 0.00% | 0.00% | 0.00% |
| k_Bacteria.p_Proteobacteria.c_TA18               | 0.00% | 0.00% | 0.00% | 0.00% | 0.00% | 0.00% | 0.00% | 0.00% | 0.00% | 0.00% | 0.00% | 0.10% | 0.10% | 0.00% | 0.10% | 0.10% | 0.00% | 0.00% | 0.10% |
| k_Bacteria.p_Proteobacteria.c_Zetaproteobacteria | 0.00% | 0.00% | 0.00% | 0.00% | 0.00% | 0.00% | 0.00% | 0.00% | 0.00% | 0.00% | 0.00% | 0.00% | 0.00% | 0.00% | 0.00% | 0.00% | 0.00% | 0.00% | 0.00% |
| k_Bacteria.p_SBR1093.c_                          | 0.00% | 0.00% | 0.00% | 0.00% | 0.00% | 0.00% | 0.00% | 0.00% | 0.00% | 0.00% | 0.00% | 0.00% | 0.00% | 0.00% | 0.00% | 0.00% | 0.00% | 0.00% | 0.00% |
| k_Bacteria.p_SBR1093.c_VHS-B5-50                 | 0.00% | 0.00% | 0.10% | 0.00% | 0.00% | 0.00% | 0.00% | 0.00% | 0.00% | 0.00% | 0.00% | 0.00% | 0.00% | 0.00% | 0.00% | 0.00% | 0.00% | 0.00% | 0.00% |
| k_Bacteria.p_SC4.c_                              | 0.00% | 0.00% | 0.00% | 0.10% | 0.10% | 0.00% | 0.00% | 0.00% | 0.00% | 0.00% | 0.10% | 0.00% | 0.00% | 0.00% | 0.10% | 0.10% | 0.00% | 0.00% | 0.10% |
| k_Bacteria.p_SR1.c_                              | 0.00% | 0.00% | 0.00% | 0.00% | 0.00% | 0.00% | 0.00% | 0.00% | 0.00% | 0.00% | 0.00% | 0.00% | 0.00% | 0.00% | 0.00% | 0.00% | 0.00% | 0.00% | 0.00% |
| k_Bacteria.p_Spirochaetes.c_GN05                 | 0.00% | 0.00% | 0.00% | 0.00% | 0.00% | 0.00% | 0.00% | 0.00% | 0.00% | 0.00% | 0.00% | 0.00% | 0.00% | 0.00% | 0.00% | 0.00% | 0.00% | 0.00% | 0.00% |
| k_Bacteria.p_Spirochaetes.c_MVP-15               | 0.00% | 0.00% | 0.00% | 0.00% | 0.00% | 0.00% | 0.00% | 0.00% | 0.00% | 0.00% | 0.00% | 0.00% | 0.00% | 0.00% | 0.00% | 0.00% | 0.00% | 0.00% | 0.00% |
| k_Bacteria.p_Spirochaetes.c_[Brevinematae]       | 0.00% | 0.00% | 0.00% | 0.00% | 0.00% | 0.00% | 0.00% | 0.00% | 0.00% | 0.00% | 0.00% | 0.00% | 0.00% | 0.00% | 0.00% | 0.00% | 0.00% | 0.00% | 0.00% |
| k_Bacteria.p_Spirochaetes.c_[Leptospirae]        | 0.00% | 0.00% | 0.00% | 0.20% | 0.00% | 0.00% | 0.00% | 0.00% | 0.00% | 0.00% | 0.00% | 0.00% | 0.00% | 0.00% | 0.00% | 0.00% | 0.00% | 0.00% | 0.00% |
| k_Bacteria.p_TM6.c_                              | 0.00% | 0.00% | 0.00% | 0.00% | 0.00% | 0.00% | 0.00% | 0.00% | 0.00% | 0.00% | 0.00% | 0.00% | 0.00% | 0.00% | 0.00% | 0.00% | 0.00% | 0.00% | 0.00% |
| k_Bacteria.p_TM6.c_SBRH58                        | 0.00% | 0.00% | 0.00% | 0.00% | 0.00% | 0.00% | 0.00% | 0.00% | 0.00% | 0.00% | 0.00% | 0.00% | 0.00% | 0.00% | 0.10% | 0.00% | 0.00% | 0.00% | 0.00% |
| k_Bacteria.p_TM7.Other                           | 0.00% | 0.00% | 0.00% | 0.00% | 0.00% | 0.00% | 0.00% | 0.00% | 0.00% | 0.00% | 0.00% | 0.00% | 0.00% | 0.00% | 0.00% | 0.00% | 0.00% | 0.00% | 0.00% |
| k_Bacteria.p_TM7.c_                              | 0.00% | 0.10% | 0.00% | 0.00% | 0.00% | 0.00% | 0.00% | 0.00% | 0.00% | 0.00% | 0.20% | 0.00% | 0.00% | 0.10% | 0.00% | 0.00% | 0.10% | 0.00% | 0.00% |
| k_Bacteria.p_TM7.c_MJK10                         | 0.00% | 0.00% | 0.00% | 0.00% | 0.00% | 0.00% | 0.00% | 0.00% | 0.00% | 0.00% | 0.00% | 0.00% | 0.00% | 0.00% | 0.00% | 0.00% | 0.00% | 0.00% | 0.00% |
| k_Bacteria.p_Teneritutes.c_Mollicutes            | 0.00% | 0.00% | 0.00% | 0.00% | 0.00% | 0.00% | 0.00% | 0.00% | 0.00% | 0.00% | 0.10% | 0.00% | 0.00% | 0.00% | 0.00% | 0.00% | 0.00% | 0.00% | 0.00% |
| k_Bacteria.p_Verrucomicrobia.Other               | 0.00% | 0.00% | 0.00% | 0.00% | 0.00% | 0.00% | 0.00% | 0.00% | 0.00% | 0.00% | 0.00% | 0.00% | 0.00% | 0.00% | 0.00% | 0.00% | 0.00% | 0.00% | 0.00% |
| k_Bacteria.p_Verrucomicrobia.c_                  | 0.00% | 0.00% | 0.00% | 0.00% | 0.00% | 0.00% | 0.00% | 0.00% | 0.00% | 0.00% |       |       |       |       |       |       |       |       |       |
